# Supplementary material
Source: Springer Nature journal article supplement (https://www.springermedizin.de/resource/supplementary/13229_2014_130_MOESM7_ESM.pdf/9676242)

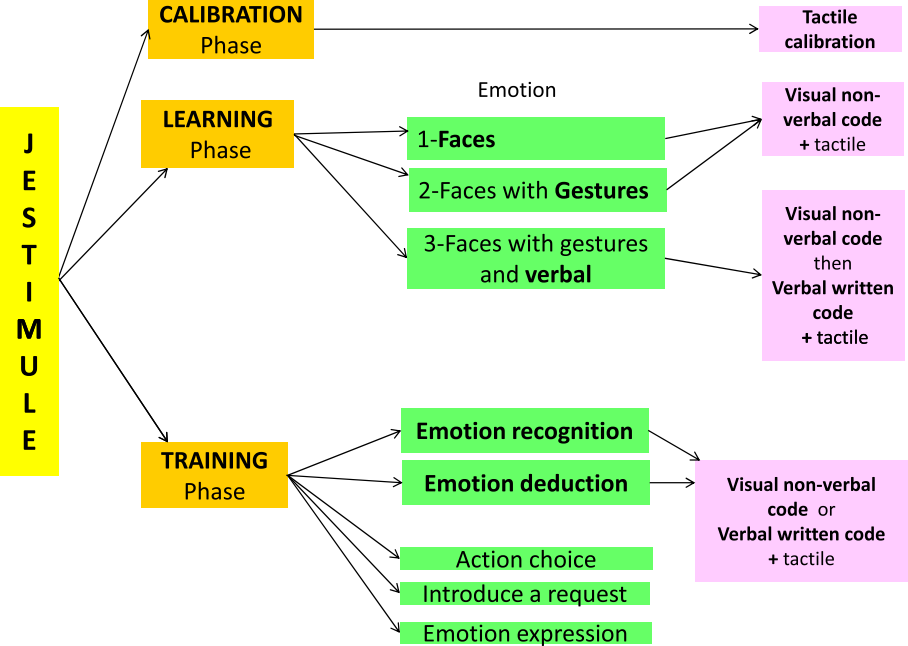

Supplement: MOESM7 [file 9676242]
